# Supplementary material for: Correlation between CD4 T-Cell Counts and Seroconversion among COVID-19 Vaccinated Patients with HIV: A Meta-Analysis
Source: MDPI journal article supplement (doi:10.3390/vaccines11040789), 2023-04-04
Supplement: s1 [file s1]

**A**

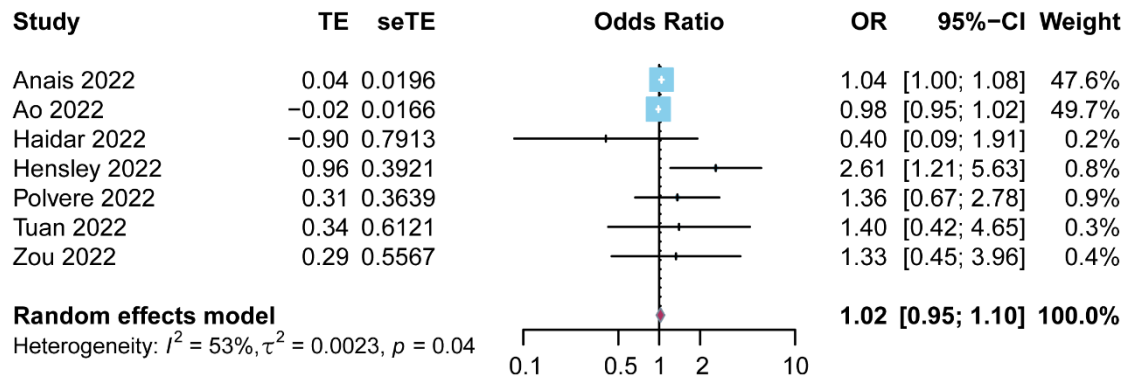

**B**

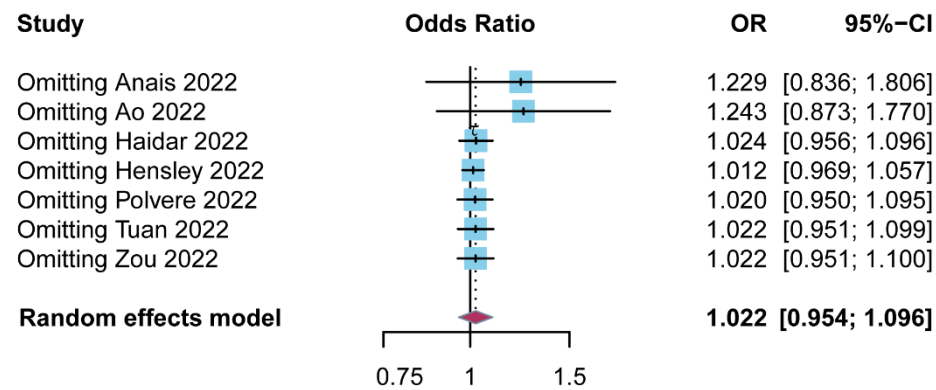

**Figure S1.** The forest plot (A), and the sensitivity analysis using “leaving-one-out” per time approach (B) for the pooled odds ratio of age associated with serologic response in patients with living HIV after COVID-19 vaccination.

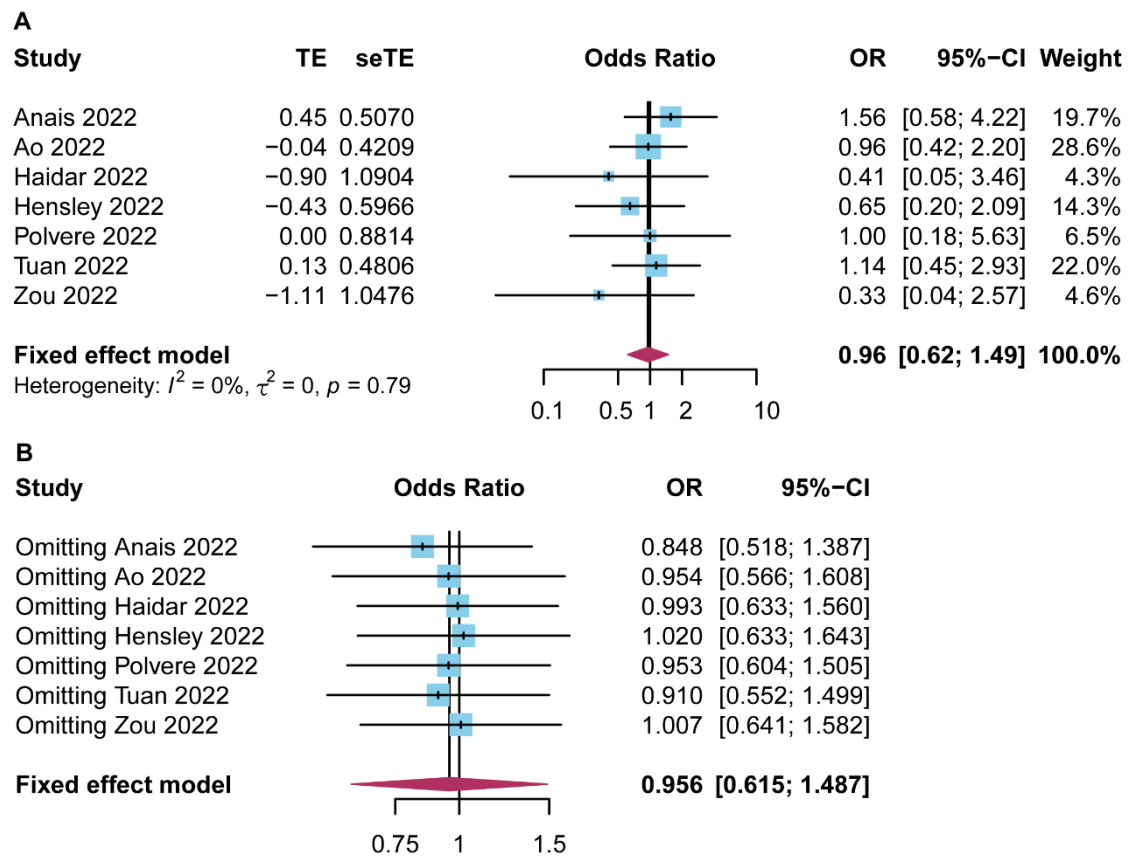

**Figure S2.** The forest plot (A), and the sensitivity analysis using “leaving-one-out” per time approach (B) for the pooled odds ratio of gender associated with serologic response in patients with living HIV after COVID-19 vaccination.

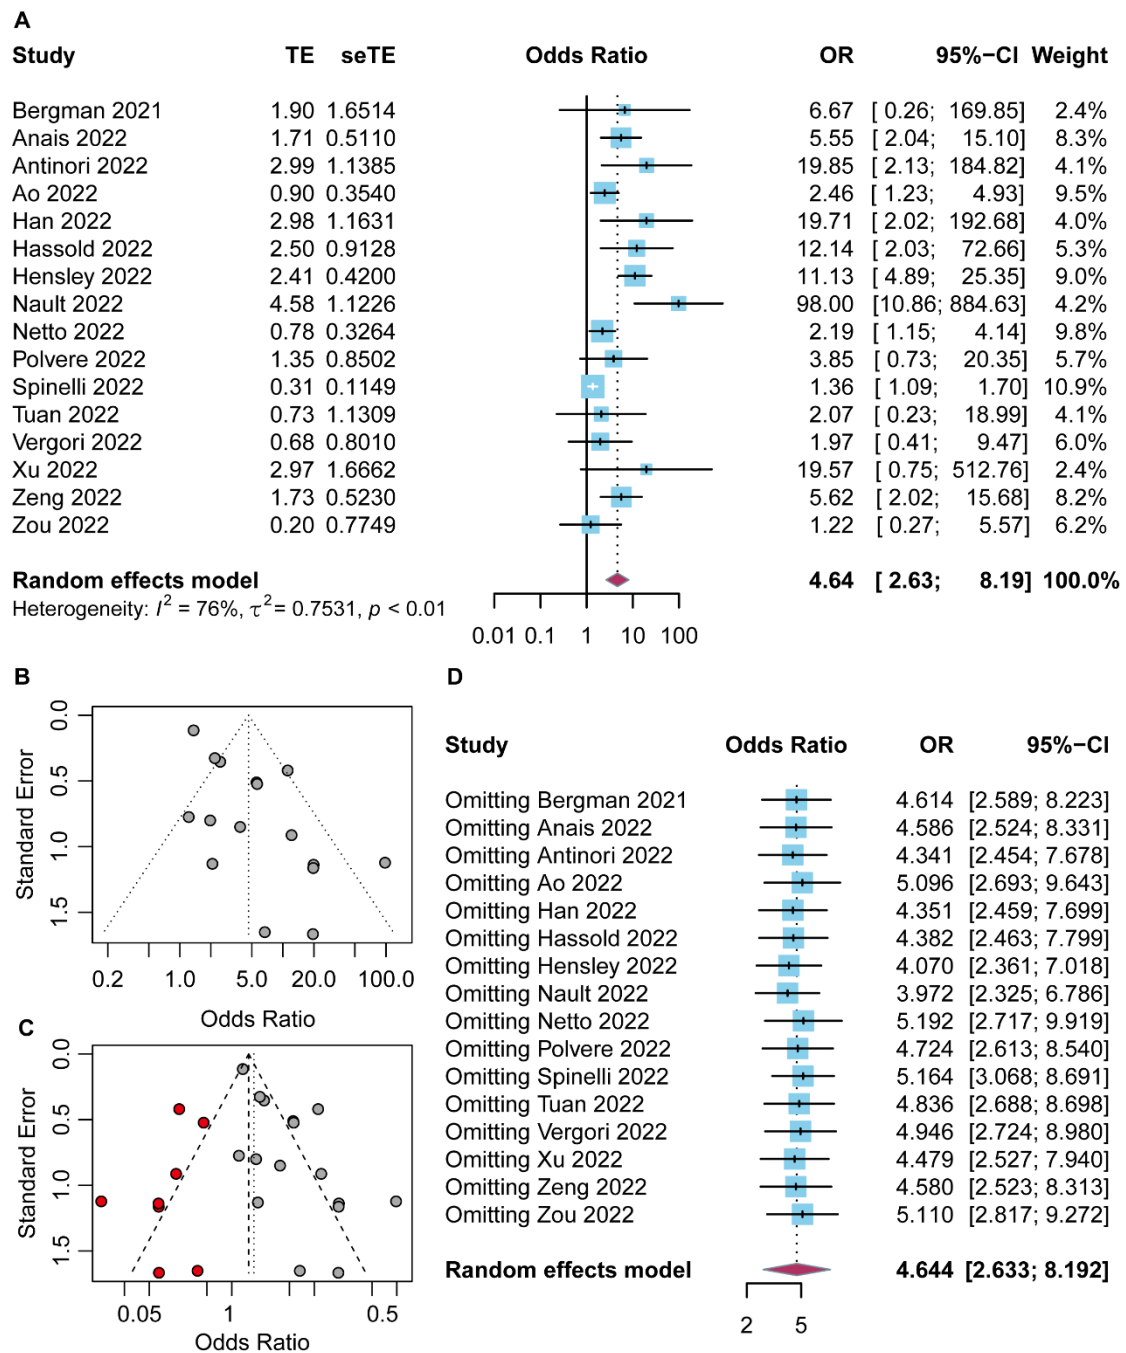

**Figure S3.** The forest plot (A), the funnel plot (B), the funnel plot after trim-and-fill analysis (C), and the sensitivity analysis using “leaving-one-out” per time approach (D) for the pooled odds ratio of CD4 T-cell counts associated with serologic response in patients with living HIV after COVID-19 vaccination.

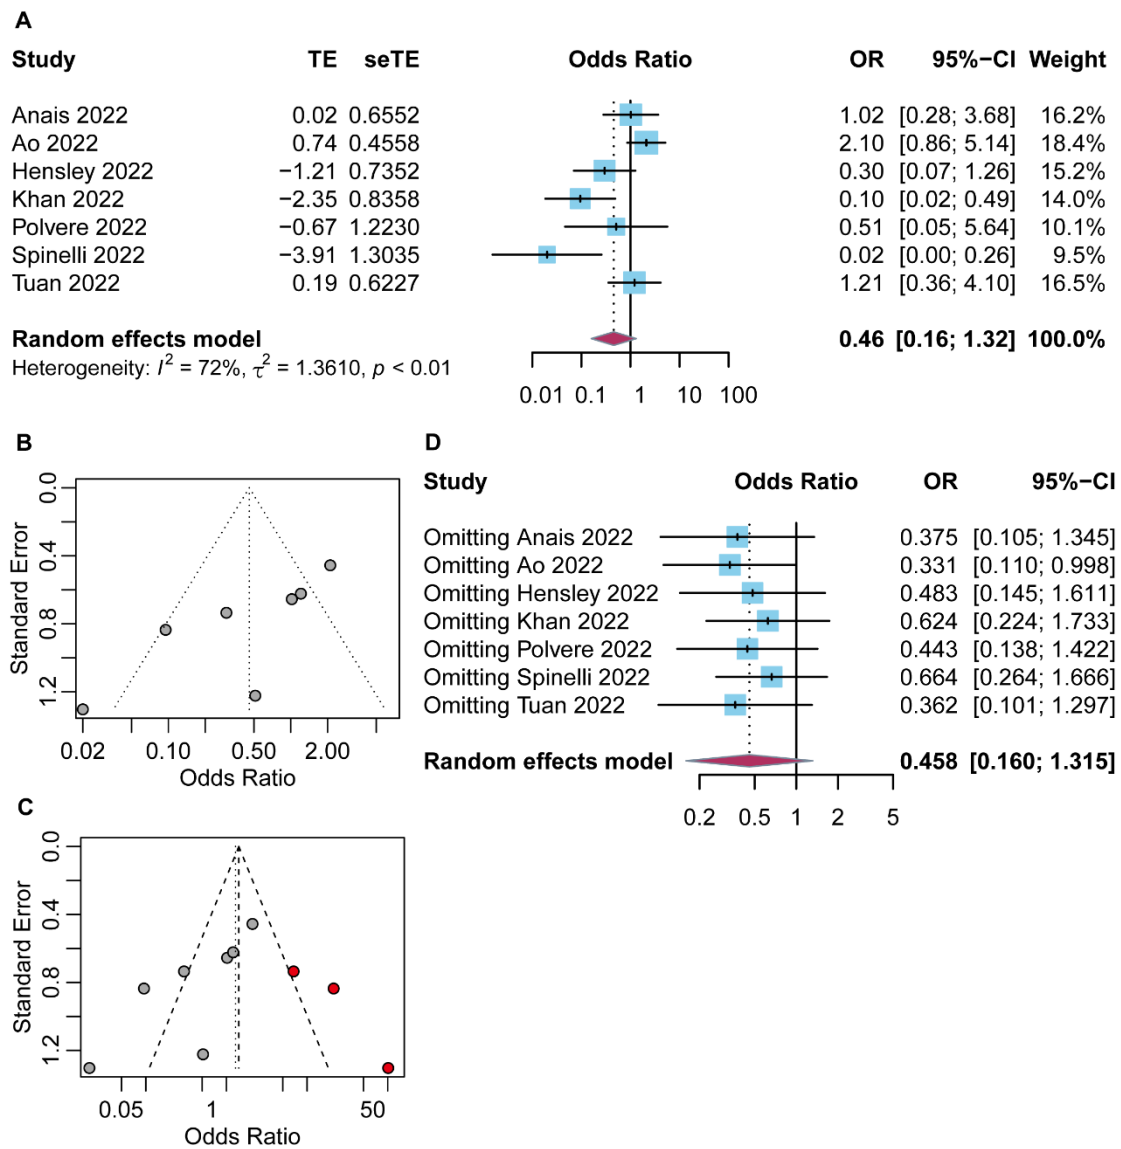

**Figure S4.** The forest plot (A), the funnel plot (B), the funnel plot after trim-and-fill analysis (C), and the sensitivity analysis using “leaving-one-out” per time approach (B) for the pooled odds ratio of HIV viral load associated with serologic response in patients with living HIV after COVID-19 vaccination.

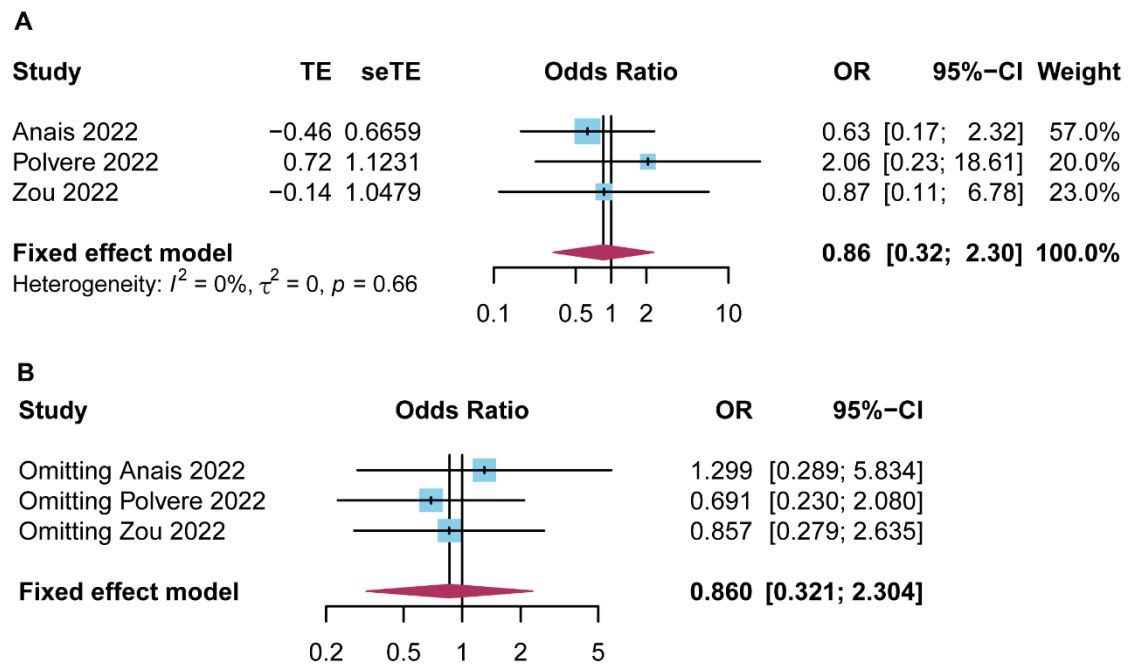

**Figure S5.** The forest plot (A), and the sensitivity analysis using “leaving-one-out” per time approach (B) for the pooled odds ratio of comorbidities associated with serologic response in patients with living HIV after COVID-19 vaccination.

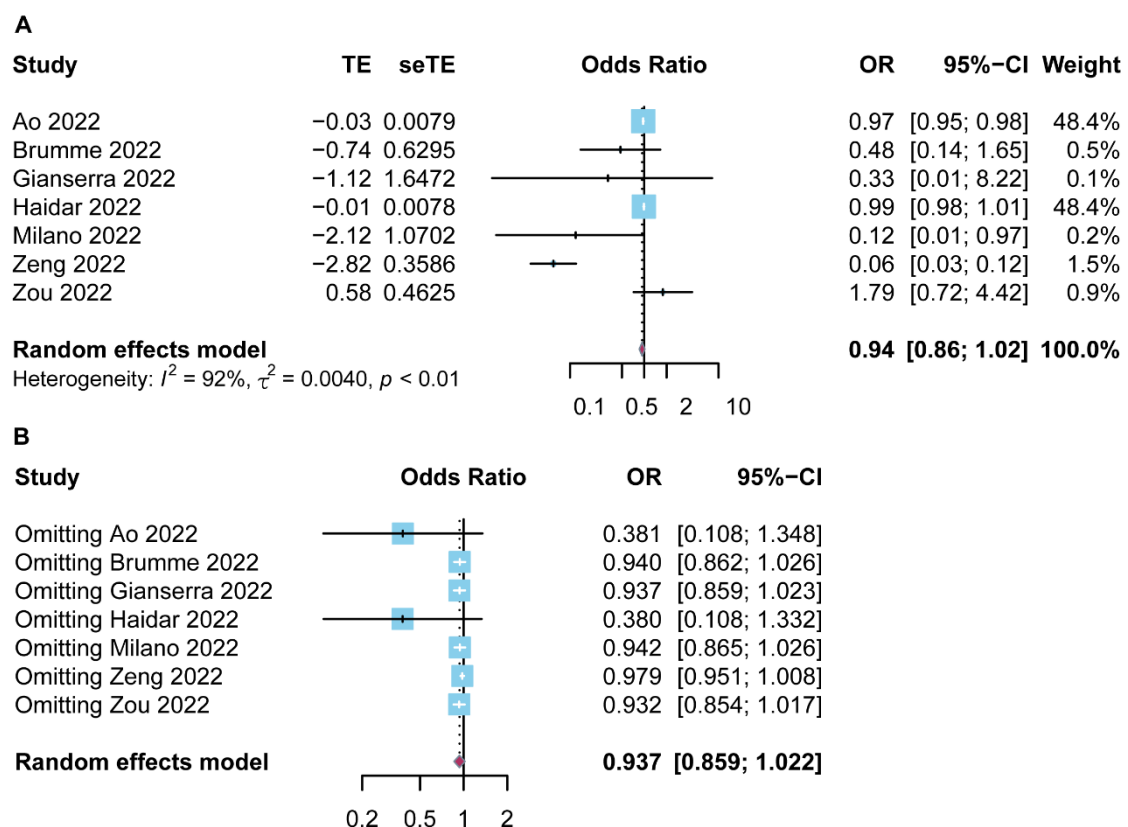

**Figure S6.** The forest plot (A), and the sensitivity analysis using “leaving-one-out” per time approach (B) for the pooled odds ratio of days after complete vaccination associated with serologic response in patients with living HIV after COVID-19 vaccination.

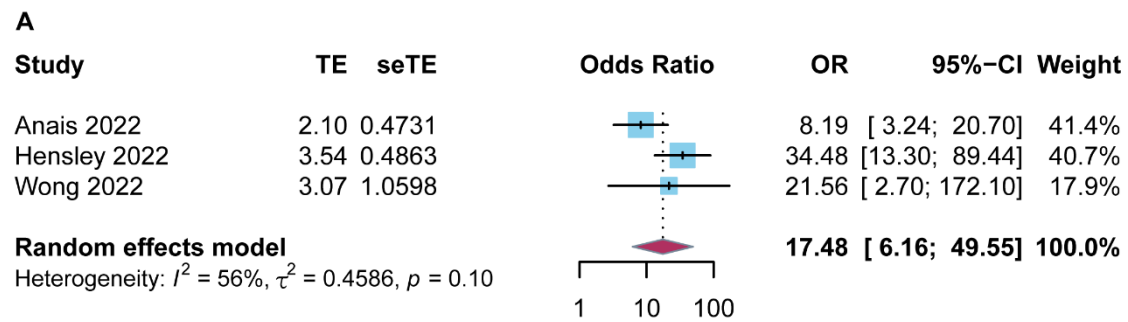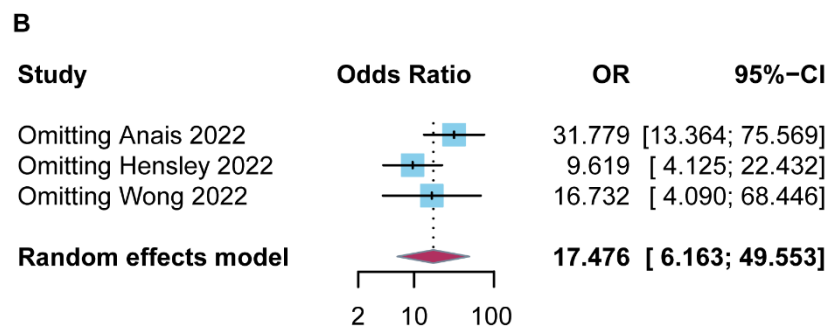

**Figure S7.** The forest plot (A), and the sensitivity analysis using “leaving-one-out” per time approach (B) for the pooled odds ratio of vaccine type associated with serologic response in patients with living HIV after COVID-19 vaccination.

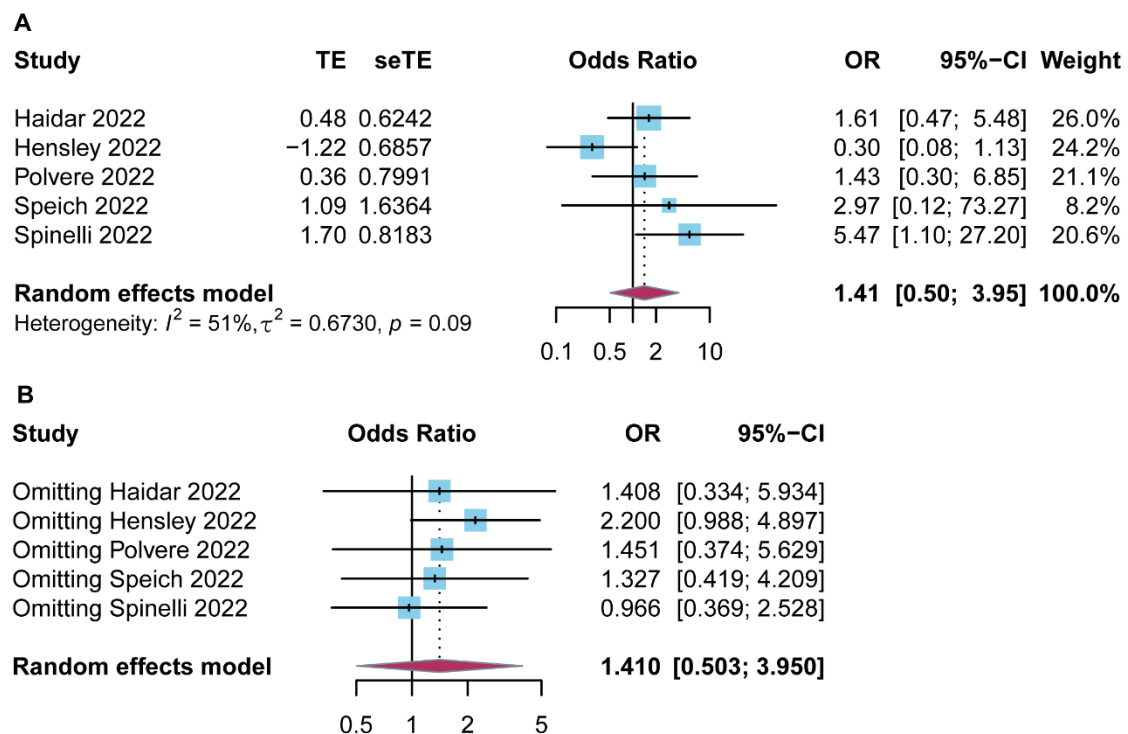

**Figure S8.** The forest plot (A), and the sensitivity analysis using “leaving-one-out” per time approach (B) for the pooled odds ratio of mRNA vaccine type associated with serologic response in patients with living HIV after COVID-19 vaccination.

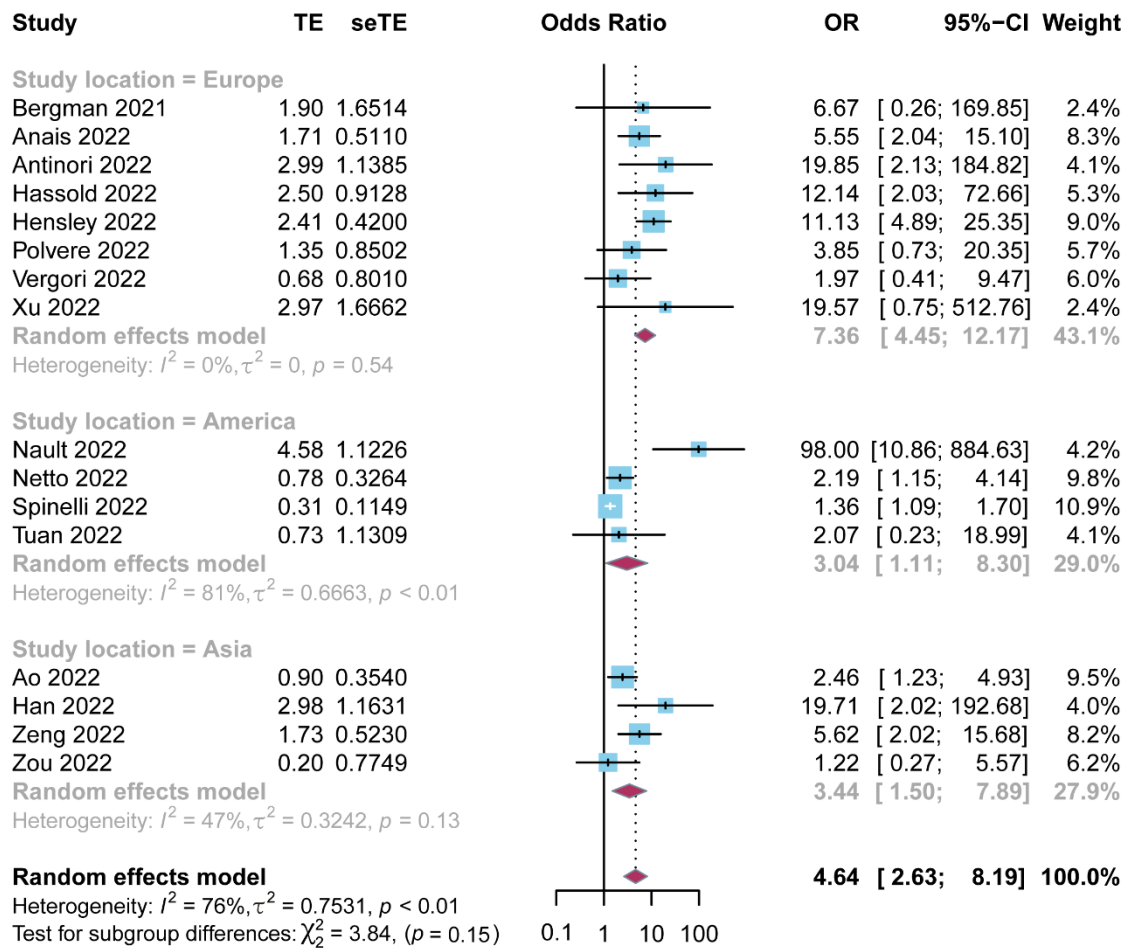

**Figure S9.** Subgroup analysis according to study location for the pooled odds ratio of CD4 counts associated with serologic response in patients with living HIV after COVID-19 vaccination.

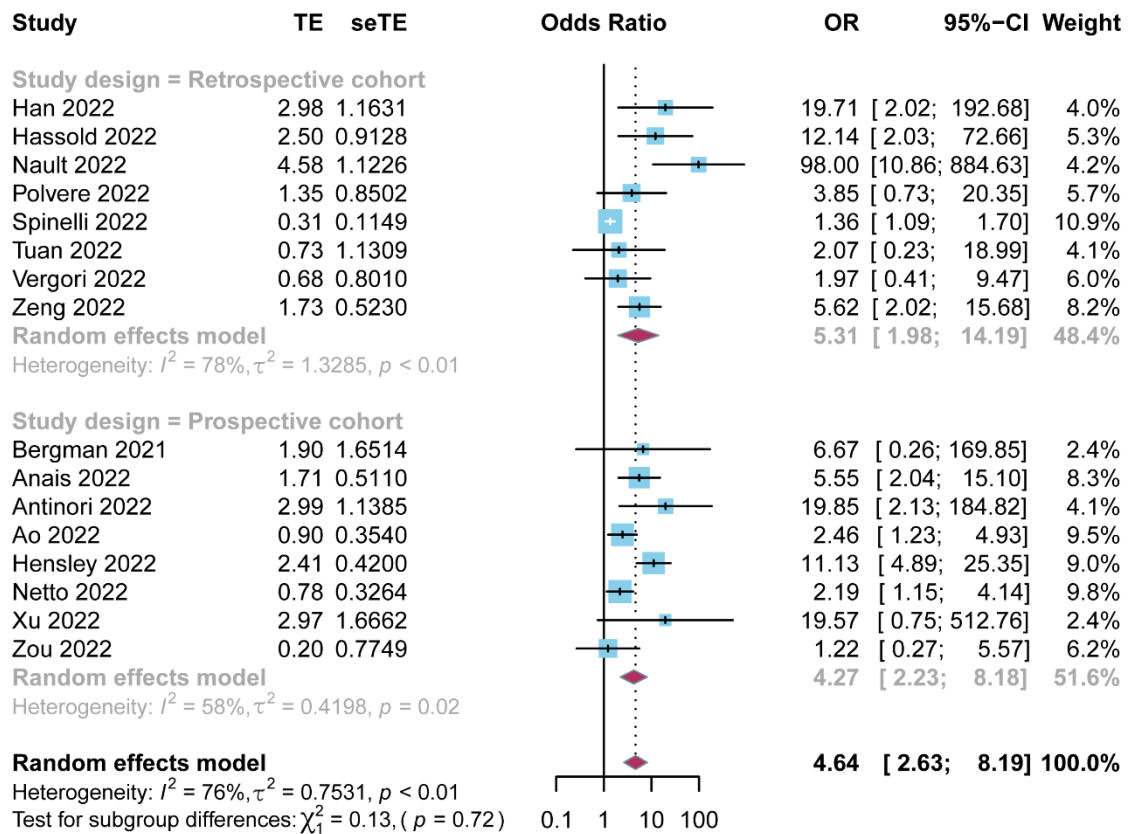

**Figure S10.** Subgroup analysis according to study design for the pooled odds ratio of CD4 counts associated with serologic response in patients with living HIV after COVID-19 vaccination.

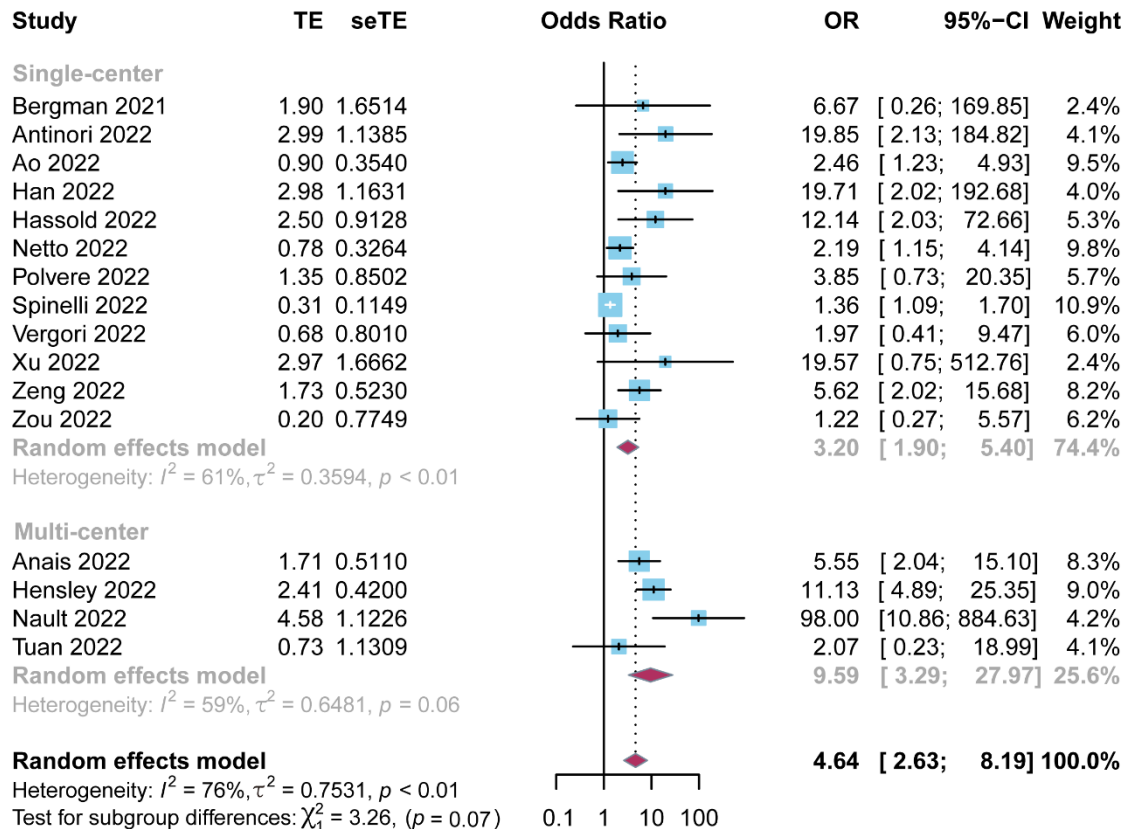

**Figure S11.** Subgroup analysis according to source of data for the pooled odds ratio of CD4 counts associated with serologic response in patients with living HIV after COVID-19 vaccination.



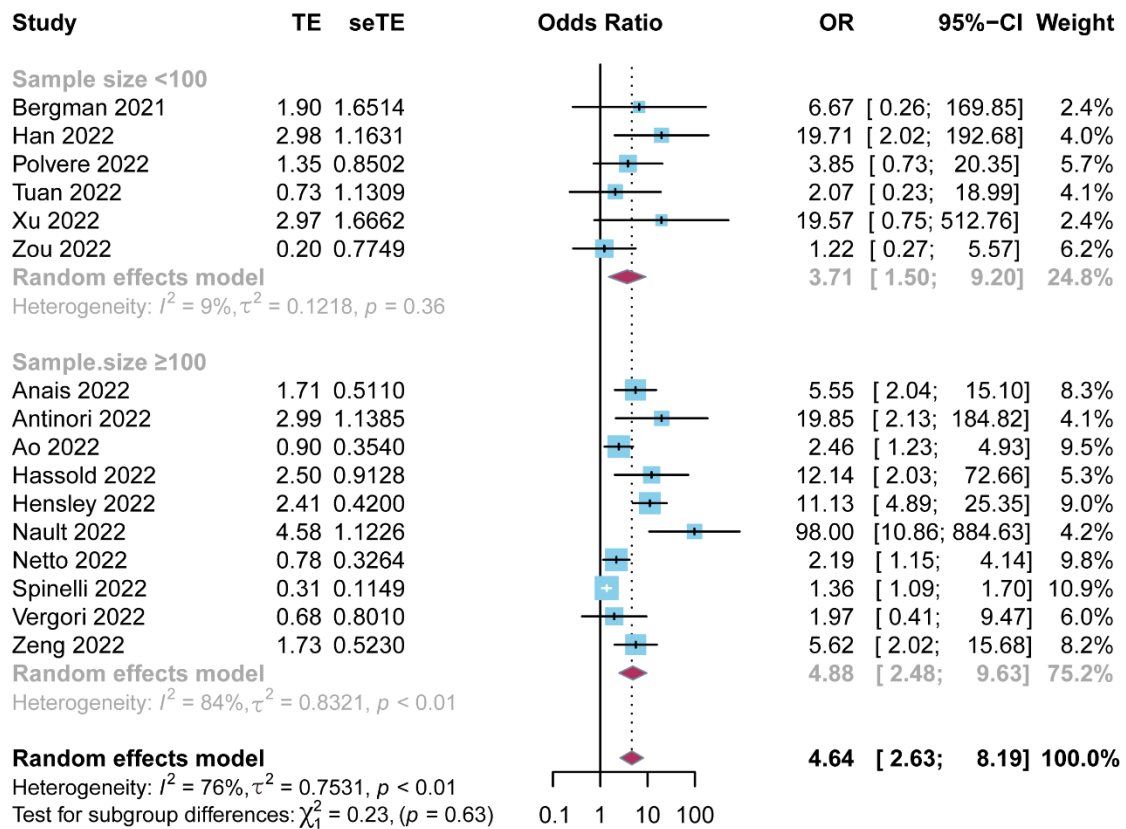

**Figure S12.** Subgroup analysis according to sample size for the pooled odds ratio of CD4 counts associated with serologic response in patients with living HIV after COVID-19 vaccination.

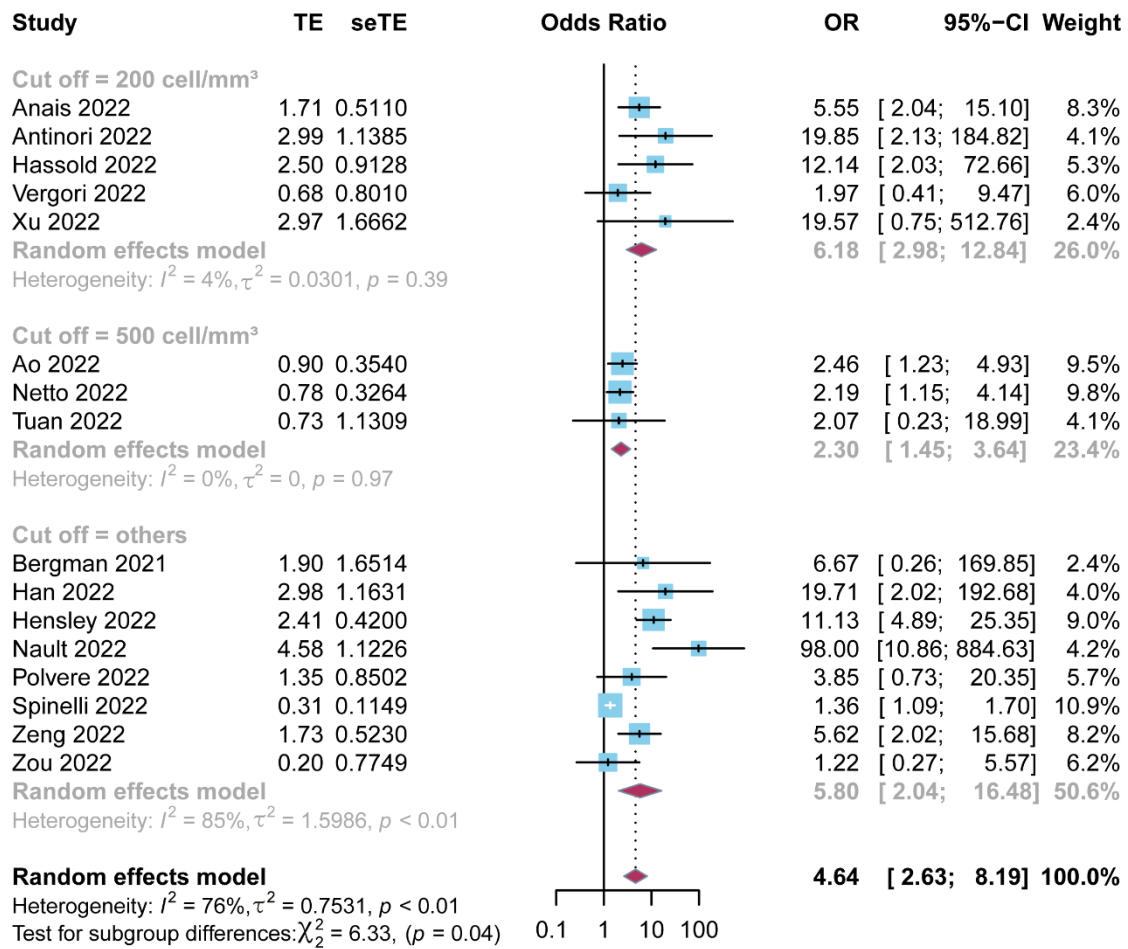

**Figure S13.** Subgroup analysis according to CD4 T-cell counts strata for the pooled odds ratio of CD4 counts associated with serologic response in patients with living HIV after COVID-19 vaccination.

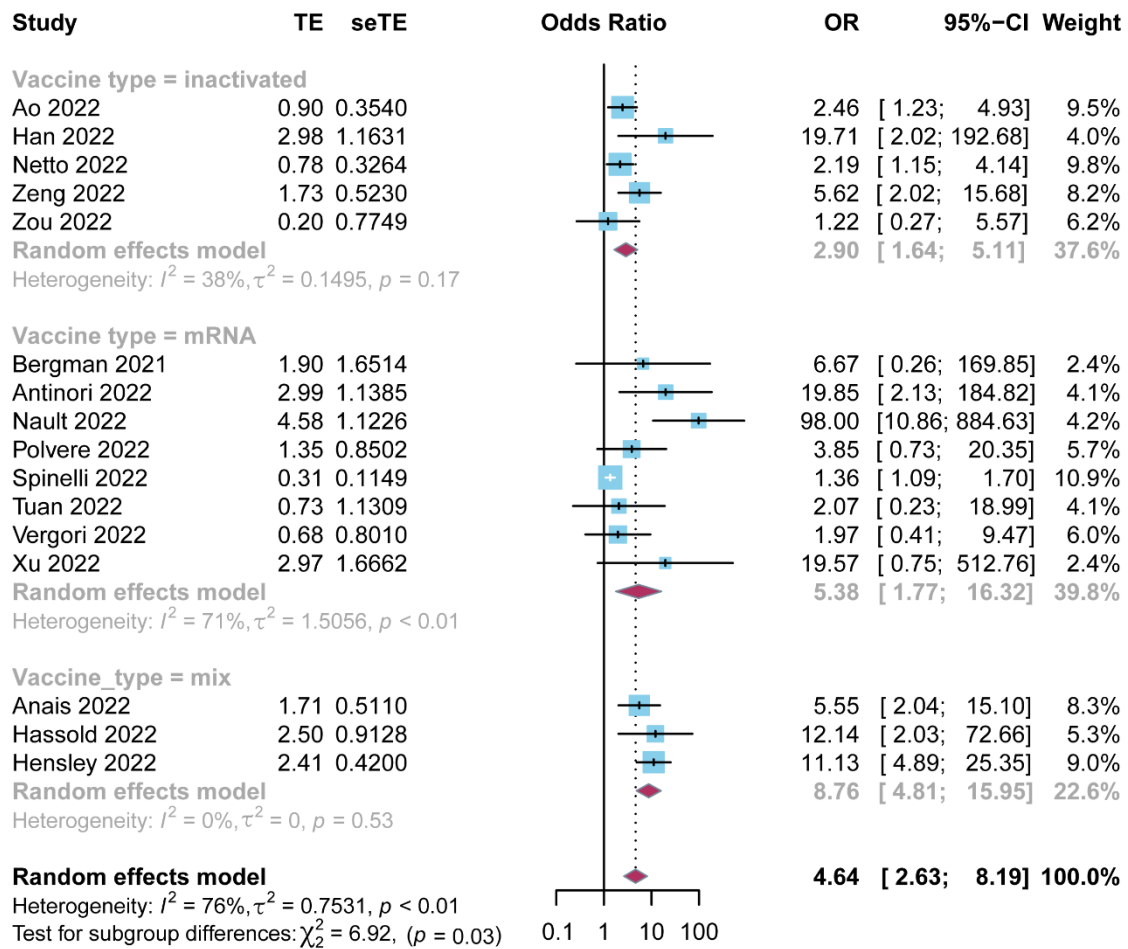

**Figure S14.** Subgroup analysis according to vaccine type for the pooled odds ratio of CD4 counts associated with serologic response in patients with living HIV after COVID-19 vaccination.

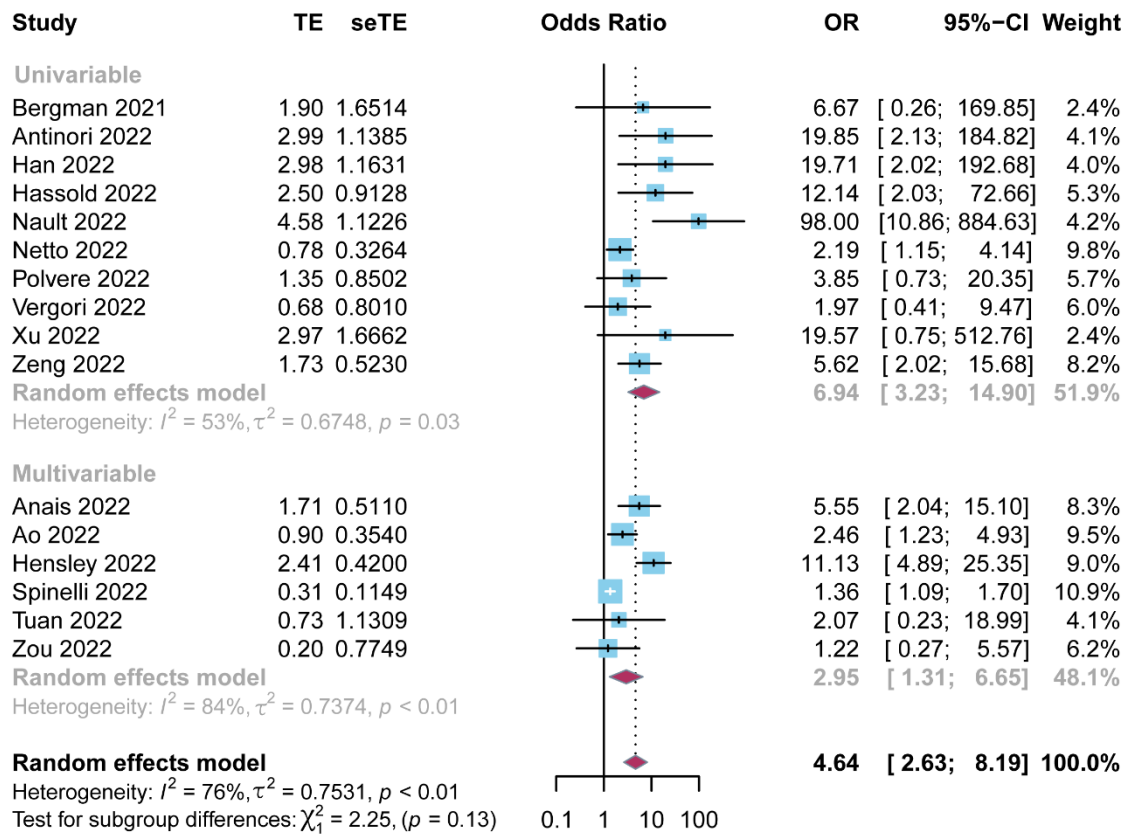

**Figure S15.** Subgroup analysis according to logistic regression analysis type for the pooled odds ratio of CD4 counts associated with serologic response in patients with living HIV after COVID-19 vaccination.

**Table S1.** The detailed search strategy.

| Databases                | Search Strategies                                                                                                                                                                                                                                                                                                                                                                                                                                                                                                                                                     | Articles' Number |
|--------------------------|-----------------------------------------------------------------------------------------------------------------------------------------------------------------------------------------------------------------------------------------------------------------------------------------------------------------------------------------------------------------------------------------------------------------------------------------------------------------------------------------------------------------------------------------------------------------------|------------------|
| PubMed                   | #1 corona[ti] OR covid*[ti] OR sars[ti] OR severe acute respiratory syndrome[ti] OR ncov*[ti] OR "severe acute respiratory syndrome coronavirus 2" [Supplementary Concept] OR "COVID-19" [Supplementary Concept] OR (wuhan[tiab] AND coronavirus[tiab]) OR (wuhan[tiab] AND pneumonia virus[tiab]) OR COVID19[tiab] OR COVID-19[tiab] OR coronavirus 2019[tiab] OR SARS-CoV-2[tiab] OR SARS2[tiab] OR SARS-2[tiab] OR "severe acute respiratory syndrome 2"[tiab] OR 2019-nCoV[tiab] OR (novel coronavirus[tiab] AND 2019[tiab]) NOT (animals[mesh] NOT humans[mesh]) | 708              |
|                          | #2 “Vaccines”[MeSH] OR “vaccination”[MeSH] OR vaccine[All Fields] OR vaccination[All Fields] OR vaccin*[All Fields]                                                                                                                                                                                                                                                                                                                                                                                                                                                   |                  |
|                          | #3 “HIV Infections” [MeSH] OR “HIV”[MeSH] OR “hiv”[tw] OR hiv infect*[tw] OR “human immunodeficiency virus”[tw] OR “human immunodeficiency virus”[tw] OR “human immuno-deficiency virus”[tw] OR “human immune-deficiency virus”[tw] OR ((human immun*) AND (“deficiency virus”[tw])) OR “acquired immunodeficiency syndrome”[tw] OR “acquired immunodeficiency syndrome”[tw] OR “acquired immuno-deficiency syndrome”[tw] OR “acquired immune-deficiency syndrome”[tw] OR ((acquired immun*) AND (“deficiency syndrome”[tw]))                                         |                  |
|                          | #4 #1 AND #2 AND #3                                                                                                                                                                                                                                                                                                                                                                                                                                                                                                                                                   |                  |
| Embase                   | #1 covid19 OR 'covid 19' OR 'sars cov 2' OR 'sars cov2' OR 'severe acute respiratory syndrome coronavirus 2' OR '2019 ncov' OR 2019ncov OR coronavirus                                                                                                                                                                                                                                                                                                                                                                                                                | 603              |
|                          | #2 'coronavirus infections'/exp                                                                                                                                                                                                                                                                                                                                                                                                                                                                                                                                       |                  |
|                          | #3 'coronavirinae'/exp                                                                                                                                                                                                                                                                                                                                                                                                                                                                                                                                                |                  |
|                          | #4 #1 OR #2 OR #3                                                                                                                                                                                                                                                                                                                                                                                                                                                                                                                                                     |                  |
|                          | #5 'vaccination'/exp OR vaccine OR vaccination OR vaccin*                                                                                                                                                                                                                                                                                                                                                                                                                                                                                                             |                  |
|                          | #6 'human immunodeficiency virus infection'/exp OR 'human immunodeficiency virus'/exp OR 'hiv':ti,ab OR 'human immunodeficiency virus':ti,ab OR 'human immuno-deficiency virus':ti,ab OR 'human immunodeficiency virus':ti,ab OR 'human immune-deficiency virus':ti,ab OR 'acquired immune-deficiency syndrome':ti,ab OR 'acquired immunodeficiency syndrome':ti,ab OR 'acquired immunodeficiency syndrome':ti,ab OR 'acquired immuno-deficiency syndrome':ti,ab                                                                                                      |                  |
|                          | #7 #4 AND #5 AND #6                                                                                                                                                                                                                                                                                                                                                                                                                                                                                                                                                   |                  |
| Cochrane Library         | #1 MeSH descriptor: [COVID-19] explode all trees                                                                                                                                                                                                                                                                                                                                                                                                                                                                                                                      | 281              |
|                          | #2 covid-19 or covid19 or covid-19 or sars-cov-2 or sars-cov2 or 'severe acute respiratory syndrome coronavirus 2' or 2019ncov or coronavirus                                                                                                                                                                                                                                                                                                                                                                                                                         |                  |
|                          | #3 MeSH descriptor: [Coronaviridae] explode all trees                                                                                                                                                                                                                                                                                                                                                                                                                                                                                                                 |                  |
|                          | #4 #1 OR #2 OR #3                                                                                                                                                                                                                                                                                                                                                                                                                                                                                                                                                     |                  |
|                          | #5 MeSH descriptor: [HIV Infections] explode all trees                                                                                                                                                                                                                                                                                                                                                                                                                                                                                                                |                  |
|                          | #6 MeSH descriptor: [HIV] explode all trees                                                                                                                                                                                                                                                                                                                                                                                                                                                                                                                           |                  |
|                          | #7 hiv OR 'hiv infect*' OR 'human immunodeficiency virus' OR 'human immunodeficiency virus' OR 'human immuno-deficiency virus' OR 'human immune-deficiency virus' OR ((human immun*) AND (“deficiency virus”)) OR 'acquired immunodeficiency syndrome' OR 'acquired immunodeficiency syndrome' OR 'acquired immuno-deficiency syndrome' OR 'acquired immune-deficiency syndrome' OR ((acquired immun*) AND (“deficiency syndrome”))                                                                                                                                   |                  |
|                          | #8 #5 OR #6 OR #7                                                                                                                                                                                                                                                                                                                                                                                                                                                                                                                                                     |                  |
|                          | #9 #4 AND #8                                                                                                                                                                                                                                                                                                                                                                                                                                                                                                                                                          |                  |
| Duplications             |                                                                                                                                                                                                                                                                                                                                                                                                                                                                                                                                                                       | -172             |
| Total after duplications |                                                                                                                                                                                                                                                                                                                                                                                                                                                                                                                                                                       | 1420             |

**Table S2. Risk of bias of all included studies.**

**Risk of bias of randomized controlled trails (Cochrane Risk of Bias 2 Tool).**

| <b>Studies (Year)</b> | <b>Sequence Generation</b> | <b>Allocation Concealment</b> | <b>Blinding of Participants</b> | <b>Blinding of Outcome Assessors</b> | <b>Incomplete Data</b> | <b>Selective Outcomes Reporting</b> | <b>Other Sources</b> | <b>Overall Bias</b> |
|-----------------------|----------------------------|-------------------------------|---------------------------------|--------------------------------------|------------------------|-------------------------------------|----------------------|---------------------|
| Speich 2022           | L                          | L                             | High                            | High                                 | L                      | L                                   | L                    | High                |

**Risk of bias of cohort studies using the ROBINS-I scale.**

| <b>Studies (Year)</b> | <b>Con-founding</b> | <b>Participant Selection</b> | <b>Classification of Interventions</b> | <b>Deviations from Intended Interventions</b> | <b>Missing Data</b> | <b>Outcome Measurement</b> | <b>Selective Outcome Re-<br/>porting</b> | <b>Overall Bias</b> |
|-----------------------|---------------------|------------------------------|----------------------------------------|-----------------------------------------------|---------------------|----------------------------|------------------------------------------|---------------------|
| Bergman 2021          | S                   | L                            | L                                      | L                                             | L                   | L                          | L                                        | S                   |
| Antinori 2022         | C                   | L                            | L                                      | L                                             | L                   | L                          | L                                        | C                   |
| Ao 2022               | C                   | L                            | L                                      | L                                             | L                   | L                          | L                                        | C                   |
| Brumme 2022           | S                   | L                            | L                                      | L                                             | L                   | L                          | L                                        | S                   |
| Haidar 2022           | C                   | L                            | L                                      | L                                             | L                   | L                          | L                                        | C                   |
| Han 2022              | S                   | L                            | L                                      | L                                             | L                   | L                          | L                                        | S                   |
| Hensley 2022          | C                   | L                            | L                                      | L                                             | L                   | L                          | L                                        | C                   |
| Khan 2022             | C                   | M                            | L                                      | L                                             | L                   | L                          | L                                        | C                   |
| Nault 2022            | C                   | M                            | L                                      | L                                             | L                   | L                          | L                                        | C                   |
| Netto 2022            | C                   | L                            | L                                      | L                                             | L                   | L                          | L                                        | C                   |
| Polvere 2022          | C                   | L                            | L                                      | L                                             | L                   | L                          | L                                        | C                   |
| Spinelli 2022         | M                   | L                            | L                                      | L                                             | L                   | L                          | L                                        | M                   |
| Vergori 2022          | C                   | L                            | L                                      | L                                             | L                   | L                          | L                                        | C                   |
| Wong 2022             | S                   | L                            | L                                      | L                                             | L                   | L                          | L                                        | S                   |
| Xu 2022               | C                   | L                            | L                                      | L                                             | L                   | L                          | L                                        | C                   |
| Zeng 2022             | C                   | L                            | L                                      | L                                             | L                   | L                          | L                                        | C                   |
| Zou 2022              | C                   | L                            | L                                      | L                                             | L                   | L                          | L                                        | C                   |

**Table S3.** Meta-regression for odds ratio for the seroconversion in COVID-19 vaccinated PLWH with high and low CD4 T cells.

| Variable                 | $\beta$ | 95% LCI | 95% UCI | <i>p</i> |
|--------------------------|---------|---------|---------|----------|
| Study location           |         |         |         |          |
| Europe                   | 0.8601  | -0.0755 | 1.7957  | 0.0716   |
| America                  | -0.6694 | -1.6967 | 0.3578  | 0.2015   |
| Asia                     | -0.3624 | -1.7000 | 0.9752  | 0.5954   |
| Study design             | -0.0927 | -1.2635 | 1.0780  | 0.8766   |
| Source of data           | 1.0619  | -0.0085 | 2.1323  | 0.0519   |
| Sample Size              | 0.1441  | -1.1838 | 1.4720  | 0.8316   |
| Cut off                  |         |         |         |          |
| 200 cell/mm <sup>3</sup> | 0.5634  | -0.6888 | 1.8157  | 0.3779   |
| 500 cell/mm <sup>3</sup> | -0.9765 | -2.4818 | 0.5287  | 0.2035   |
| Others                   | 0.2503  | -0.9855 | 1.4860  | 0.6914   |
| Vaccine type             |         |         |         |          |
| Inactivated vaccine      | -0.6323 | -1.936  | 0.6717  | 0.3419   |
| mRNA vaccine             | -0.0130 | -1.1538 | 1.1278  | 0.9822   |
| mix                      | 0.9181  | -0.2190 | 2.0552  | 0.1135   |
| Multivariable analysis   | -0.8637 | -1.9819 | 0.2545  | 0.1301   |

$\beta$  : regression coefficient; LCI: lower confidence interval; UCI: upper confidence interval.

**Table S4.** Certainty of evidence and summary effect estimates assessed by GRADE (grading of recommendations, assessment, development, and evaluation) of the study outcomes. Meta-analysis of observational studies assessing factors associated with serological response to vaccine in people living with HIV.

| Outcomes                                                                                                  | Starting Level of Evidence | Quality assessment§ |               |              |            |                  | Reasons to Increase Level of Evidence*  | Overall Quality of Evidence |
|-----------------------------------------------------------------------------------------------------------|----------------------------|---------------------|---------------|--------------|------------|------------------|-----------------------------------------|-----------------------------|
|                                                                                                           |                            | Risk of Bias        | Inconsistency | Indirectness | Impression | Publication Bias |                                         |                             |
| Overall odds ratio of age associated with serological response to vaccination                             | Low                        | Serious             | Serious       | Not serious  | Serious    | Not serious      | -                                       | Very low                    |
| Overall odds ratio of gender associated with serological response to vaccination                          | Low                        | Serious             | Not serious   | Not serious  | Serious    | Serious          | -                                       | Very low                    |
| Overall odds ratio of CD4 count associated with serological response to vaccination                       | Low                        | Serious             | Serious       | Not serious  | Serious    | Serious          | Dose-response gradient;<br>Large effect | Very low                    |
| Overall odds ratio of HIV viral load associated with serological response to vaccination                  | Low                        | Serious             | Serious       | Not serious  | Serious    | Serious          | -                                       | Very low                    |
| Overall odds ratio of comorbidities associated with serological response to vaccination                   | Low                        | Serious             | Not serious   | Not serious  | Serious    | Not serious      | -                                       | Very low                    |
| Overall odds ratio of days after complete vaccination associated with serological response to vaccination | Low                        | Serious             | Serious       | Not serious  | Serious    | Not serious      | -                                       | Very low                    |
| Overall odds ratio of vaccine type associated with serological response to vaccination                    | Low                        | Serious             | Serious       | Not serious  | Serious    | Not serious      | Large effect                            | Very low                    |
| Overall odds ratio of mRNA vaccine type associated with serological response to vaccination               | Low                        | Serious             | Serious       | Not serious  | Serious    | Not serious      | -                                       | Very low                    |

§ Quality assessment to decrease level of evidence include risk of bias ( $\geq 25\%$  of contributing studies were assessed as serious risk of bias), inconsistency (substantial between study heterogeneity,  $I^2 \geq 50\%$ ), indirectness (presence of factors limiting generalizability of results), impression (95% confidence intervals for risk estimates are wide above 10% for outcomes), and publication bias (evidence of small study effects). \* Reasons to increase level of evidence include large magnitude of effect (risk estimates less than 0.5), dose-response gradient or attenuation of the pooled risk estimates by plausible confounders.



**File S1. List of excluded studies (n=40).**

*Failing to odds ratio of serologic response in HIV for COVID-19 vaccine (n = 33)*

1. Chammartin F, Kusejko K, Pasin C, et al. Determinants of antibody response to severe acute respiratory syndrome coronavirus 2 mRNA vaccines in people with HIV. *AIDS*. 2022;36(10):1465-1468. doi:10.1097/QAD.0000000000003246
2. Healy K, Pin E, Chen P, et al. Salivary IgG to SARS-CoV-2 indicates seroconversion and correlates to serum neutralization in mRNA-vaccinated immunocompromised individuals. *Med (N Y)*. 2022;3(2):137-153.e3. doi:10.1016/j.medj.2022.01.001
3. Woldemeskel BA, Karaba AH, Garliss CC, et al. Decay of coronavirus disease 2019 mRNA vaccine-induced immunity in people with HIV. *AIDS*. 2022;36(9):1315-1317. doi:10.1097/QAD.0000000000003263
4. Ogbe A, Pace M, Bittaye M, et al. Durability of ChAdOx1 nCoV-19 vaccination in people living with HIV. *JCI Insight*. 2022;7(7):e157031. Published 2022 Apr 8. doi:10.1172/jci.insight.157031
5. Chantasrisawad N, Puthanakit T, Tangsathapornpong A, et al. Immunogenicity and Reactogenicity of mRNA BNT162b2 COVID-19 Vaccine among Thai Adolescents with Chronic Diseases. *Vaccines (Basel)*. 2022;10(6):871. Published 2022 May 29. doi:10.3390/vaccines10060871
6. Shinde V, Bhikha S, Hoosain Z, et al. Efficacy of NVX-CoV2373 Covid-19 Vaccine against the B.1.351 Variant. *N Engl J Med*. 2021;384(20):1899-1909. doi:10.1056/NEJMoa2103055
7. Gonzalez de Aledo M, Canizares A, Vazquez-Rodriguez P, et al. Safety and Immunogenicity of SARS-CoV-2 vaccines in people with HIV. *AIDS* 2022; 36(5): 691-5.
8. Balcells ME, Le Corre N, Duran J, et al. Reduced Immune Response to Inactivated Severe Acute Respiratory Syndrome Coronavirus 2 Vaccine in a Cohort of Immunocompromised Patients in Chile. *Clin Infect Dis* 2022; 75(1): e594-e602.
9. BessenC, Plaza-Sirvent C, Bhat J, et al. Impact of SARS-CoV-2 vaccination on systemic immune responses in people living with HIV. 2022.
10. Chan DPC, Wong NS, Wong BCK, Chan JMC, Lee SS. Three-Dose Primary Series of Inactivated COVID-19 Vaccine for Persons Living with HIV, Hong Kong. *Emerg Infect Dis* 2022; 28(10): 2130-2.
11. Cossu MV, Mileto D, Giacomelli A, et al. Does the co-morbidity burden contribute to suboptimal immunological responses to COVID-19 vaccination in people living with HIV? *J Infect Dis* 2022.
12. Feng Y, Zhang Y, He Z, et al. Immunogenicity of an inactivated SARS-CoV-2 vaccine in people living with HIV-1: a non-randomized cohort study. *EClinicalMedicine* 2022; 43: 101226.
13. Frater J, Ewer KJ, Ogbe A, et al. Safety and immunogenicity of the ChAdOx1 nCoV-19 (AZD1222) vaccine against SARS-CoV-2 in HIV infection: a single-arm substudy of a phase 2/3 clinical trial. *Lancet HIV* 2021; 8(8): e474-e85.
14. Gidari A, Bastianelli S, Pierucci S, et al. BNT162b2 Elicited an Efficient Humoral Response Against Different Strains of SARS-CoV-2 in People Living with HIV. *Curr HIV Res* 2022; 20(4): 296-300.
15. Heftdal LD, Knudsen AD, Hamm SR, et al. Humoral response to two doses of BNT162b2 vaccination in people with HIV. *J Intern Med* 2022; 291(4): 513-8.
16. Jedicke N, Stankov MV, Cossmann A, et al. Humoral immune response following prime and boost BNT162b2 vaccination in people living with HIV on antiretroviral therapy. *HIV Med* 2022; 23(5): 558-63.
17. Lapointe HR, Mwimanzi F, Cheung PK, et al. People with HIV receiving suppressive antiretroviral therapy show typical antibody durability after dual COVID-19 vaccination, and strong third dose responses. *medRxiv* 2022.
18. Levy I, Wieder-Finesod A, Litchevsky V, et al. Immunogenicity and safety of the BNT162b2 mRNA COVID-19 vaccine in people living with HIV-1. *Clin Microbiol Infect* 2021; 27(12): 1851-5.
19. Lombardi A, Butta GM, Donnici L, et al. Anti-spike antibodies and neutralising antibody activity in people living with HIV vaccinated with COVID-19 mRNA-1273 vaccine: a prospective single-centre cohort study. *Lancet Reg Health Eur* 2022; 13: 100287.
20. Loubet P, Wittkop L, Ninove L, et al. One-month humoral response following two or three doses of messenger RNA coronavirus disease 2019 vaccines as primary vaccination in specific populations in France: first results from the Agence Nationale Recherche contre le Sida (ANRS)0001S COV-POPART cohort. *Clin Microbiol Infect* 2022.
21. Lv Z, Li Q, Feng Z, et al. Inactivated SARS-CoV-2 vaccines elicit immunogenicity and T-cell responses in people living with HIV. *Int Immunopharmacol* 2022; 102: 108383.
22. Madhi SA, Koen AL, Izu A, et al. Safety and immunogenicity of the ChAdOx1 nCoV-19 (AZD1222) vaccine against SARS-CoV-2 in people living with and without HIV in South Africa: an interim analysis of a randomised, double-

- blind, placebo-controlled, phase 1B/2A trial. *Lancet HIV* 2021; 8(9): e568-e80.
23. Madhi SA, Moodley D, Hanley S, et al. Immunogenicity and safety of a SARS-CoV-2 recombinant spike protein nanoparticle vaccine in people living with and without HIV-1 infection: a randomised, controlled, phase 2A/2B trial. *Lancet HIV* 2022; 9(5): e309-e22.
  24. Oyaert M, De Scheerder MA, Van Herreweghe S, et al. Evaluation of Humoral and Cellular Responses in SARS-CoV-2 mRNA Vaccinated Immunocompromised Patients. *Front Immunol* 2022; 13: 858399.
  25. Portillo V, Fedeli C, Ustero Alonso P, et al. Impact on HIV-1 RNA Levels and Antibody Responses Following SARS-CoV-2 Vaccination in HIV-Infected Individuals. *Frontiers in Immunology* 2022; 12.
  26. Pourcher V, Belin L, Soulie C, et al. High seroconversion rate and SARS-CoV-2 Delta neutralization in people with HIV vaccinated with BNT162b2. *AIDS* 2022; 36(11): 1545-52.
  27. Rahav G, Lustig Y, Lavee J, et al. BNT162b2 mRNA COVID-19 vaccination in immunocompromised patients: A prospective cohort study. *EClinicalMedicine* 2021; 41: 101158.
  28. Ruddy JA, Boyarsky BJ, Bailey JR, et al. Safety and antibody response to two-dose SARS-CoV-2 messenger RNA vaccination in persons with HIV. *AIDS* 2021; 35(14): 2399-401.
  29. Ruddy JA, Boyarsky BJ, Bailey JR, et al. Safety and antibody response to two-dose SARS-CoV-2 messenger RNA vaccination in persons with HIV. *AIDS* 2021; 35(14): 2399-401.
  30. Schmidt KG, Harrer EG, Tascilar K, et al. Characterization of Serum and Mucosal SARS-CoV-2-Antibodies in HIV-1-Infected Subjects after BNT162b2 mRNA Vaccination or SARS-CoV-2 Infection. *Viruses* 2022; 14(3).
  31. Tan Y, Zou S, Ming F, et al. Early Efficacy and Safety of the Third Dose Inactivated COVID-19 Vaccine Among People Living With HIV. *J Acquir Immune Defic Syndr* 2022; 90(3): e1-e3.
  32. Tau L, Turner D, Adler A, et al. SARS-CoV-2 Humoral and Cellular Immune Responses of Patients With HIV After Vaccination With BNT162b2 mRNA COVID-19 Vaccine in the Tel-Aviv Medical Center. *Open Forum Infect Dis* 2022; 9(4): ofac089.
  33. Woldemeskel BA, Karaba AH, Garliss CC, et al. The BNT162b2 mRNA Vaccine Elicits Robust Humoral and Cellular Immune Responses in People Living With Human Immunodeficiency Virus (HIV). *Clin Infect Dis* 2022; 74(7): 1268-70.

*Cross-sectional study (n = 5)*

1. Cai S, Liao G, Yu T, et al. Immunogenicity and safety of an inactivated SARS-CoV-2 vaccine in people living with HIV: A cross-sectional study. *J Med Virol.* 2022;94(9):4224-4233. doi:10.1002/jmv.27872
2. Wu S, Zou S, Ming F, et al. Humoral Immune Response to Inactivated COVID-19 Vaccination at the 3rd Month among People Living with HIV. Preprint. *Res Sq.* 2022;rs.3.rs-1750225. Published 2022 Jun 27. doi:10.21203/rs.3.rs-1750225/v1
3. Huang X, Yan Y, Su B, et al. Comparing Immune Responses to Inactivated Vaccines against SARS-CoV-2 between People Living with HIV and HIV-Negative Individuals: A Cross-Sectional Study in China. *Viruses.* 2022;14(2):277. Published 2022 Jan 28. doi:10.3390/v14020277
4. Yan Y, Davgadorj C, Lyu C, Zhang S, Qiu Y. Immunogenicity of a third dose of inactivated COVID-19 vaccine in people living with HIV-1, HBV, and tuberculosis during the Omicron variant epidemic: A cross-sectional study. *J Infect.* 2022;85(4):e109-e111. doi:10.1016/j.jinf.2022.06.032
5. Liu Y, Han J, Li X, et al. COVID-19 Vaccination in People Living with HIV (PLWH) in China: A Cross Sectional Study of Vaccine Hesitancy, Safety, and Immunogenicity. *Vaccines (Basel).* 2021;9(12):1458. Published 2021 Dec 9. doi:10.3390/vaccines9121458

*Review (n = 2)*

1. Gianserra L, Donà MG, Giuliani E, et al. High seroconversion rate after vaccination with mRNA BNT162b2 vaccine against SARS-CoV-2 among people with HIV - but HIV viremia matters?. *AIDS.* 2022;36(9):1319-1320. doi:10.1097/QAD.0000000000003239
2. Wolday D, de Wit TFR. Inactivated SARS-CoV-2 vaccine for people with HIV. *EClinicalMedicine.* 2022;45:101327. Published 2022 Mar 5. doi:10.1016/j.eclinm.2022.101327
